# Supplementary material
Source: PubMed Central journal article supplement (PMC1167538)
Supplement: plntcell_tpc.105.032730_2.pdf [file plntcell_tpc.105.032730_2.pdf]

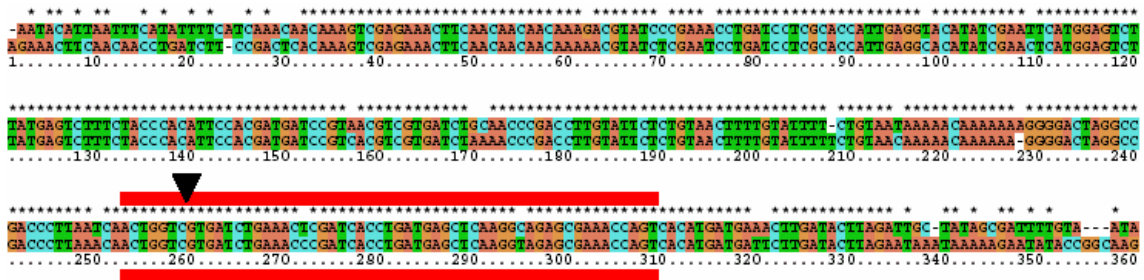

**Supplemental Data 2.** Alignment of the two conserved, 302 Nucleotide (nt) genomic sequences encoding the Hammerhead ribozymes Ara1 (top) and Ara2 (bottom). In this alignment, the conserved region starts at nucleotide 33 and ends at nucleotide 335. The hammerhead domains are marked by red bars. Indicated by a black triangle is the nucleotide, after which cleavage occurs. Ara1 maps to chromosome positions 15027890–15027834 and Ara2 to position 15032903–15032847 on chromosome IV of *A. thaliana* (The Arabidopsis Genome Initiative, 2000; Rhee et al., 2003). Alignment was performed using Clustal (Jeanmougin et al., 1998).

## References

Jeanmougin, F., Thompson, J.D., Gouy, M., Higgins, D.G., and Gibson, T.J. (1998).

Multiple sequence alignment with Clustal X. *Trends Biochem Sci* **23**, 403-405.

Rhee, S.Y., Beavis, W., Berardini, T.Z., Chen, G., Dixon, D., Doyle, A., Garcia-Hernandez, M., Huala, E., Lander, G., Montoya, M., Miller, N., Mueller, L.A., Mundodi, S., Reiser, L., Tacklind, J., Weems, D.C., Wu, Y., Xu, I., Yoo, D., Yoon, J., and Zhang, P. (2003). The Arabidopsis Information Resource (TAIR): a model organism database providing a centralized, curated gateway to Arabidopsis biology, research materials and community. *Nucleic Acids Res* **31**, 224-228.

**The Arabidopsis Genome Initiative** (2000). Analysis of the genome sequence of the flowering plant *Arabidopsis thaliana*. *Nature* **408**, 796-815.
